# Supplementary material for: Fake News, Investor Attention, and Market Reaction
Source: Atypon-hosted journal article supplement (doi:10.1287/isre.2019.0910), 2020-07-23
Supplement: isre.2019.0910.sm1.pdf [file isre.2019.0910.sm1.pdf]

## Fake News, Investor Attention, and Market Reaction

### Online Appendix

Jonathan Clarke, Hailiang Chen, Ding Du, and Yu Jeffrey Hu

**Table A1. Investor Attention to Fake News: *ReadCommentDummy***

| VARIABLES                    | (1)<br><i>Log(ReadComment)</i><br>OLS | (2)<br><i>ReadComment</i><br><i>Dummy</i><br>OLS | (3)<br><i>ReadComment</i><br><i>Dummy</i><br>Probit | (4)<br><i>ReadComment</i><br><i>Dummy</i><br>Logit |
|------------------------------|---------------------------------------|--------------------------------------------------|-----------------------------------------------------|----------------------------------------------------|
| <i>Fake</i>                  | -0.287<br>(0.387)                     | -0.089<br>(0.072)                                | -0.122<br>(0.294)                                   | -0.166<br>(0.512)                                  |
| <i>Log(Length)</i>           | 0.333<br>(0.315)                      | 0.054<br>(0.065)                                 | 0.460<br>(0.284)                                    | 0.726<br>(0.499)                                   |
| <i>%NegWord</i>              | -0.051<br>(0.288)                     | -0.021<br>(0.053)                                | 0.008<br>(0.214)                                    | 0.003<br>(0.359)                                   |
| <i>Premium</i>               | -0.130<br>(0.304)                     | -0.075<br>(0.058)                                | -0.323<br>(0.223)                                   | -0.511<br>(0.378)                                  |
| <i>EditorPick</i>            | -1.130***<br>(0.383)                  | -0.221***<br>(0.079)                             | -1.292***<br>(0.454)                                | -2.211**<br>(0.863)                                |
| <i>Log(Comment)</i>          | 0.434***<br>(0.133)                   | 0.057**<br>(0.026)                               | 0.073<br>(0.096)                                    | 0.112<br>(0.158)                                   |
| <i>%NegFactiva</i>           | 0.004<br>(0.401)                      | 0.016<br>(0.068)                                 | -0.134<br>(0.228)                                   | -0.209<br>(0.381)                                  |
| <i>Factiva</i>               | 0.566<br>(0.346)                      | 0.120*<br>(0.068)                                | 0.641**<br>(0.261)                                  | 1.075**<br>(0.444)                                 |
| <i>PosEA</i>                 | -0.778<br>(0.611)                     | -0.258*<br>(0.140)                               |                                                     |                                                    |
| <i>NegEA</i>                 | -0.708<br>(0.863)                     | -0.168<br>(0.146)                                | -0.415<br>(0.879)                                   | -0.747<br>(1.580)                                  |
| <i>Log(Size)</i>             | -0.312*<br>(0.190)                    | -0.063<br>(0.043)                                | -0.539***<br>(0.153)                                | -0.900***<br>(0.275)                               |
| <i>Market-to-Book</i>        | 0.002<br>(0.002)                      | 0.000<br>(0.000)                                 | 0.048***<br>(0.018)                                 | 0.076**<br>(0.033)                                 |
| <i>ROA</i>                   | 0.412**<br>(0.188)                    | 0.067<br>(0.043)                                 | 0.188<br>(0.153)                                    | 0.329<br>(0.262)                                   |
| <i>LEV</i>                   | 0.099<br>(0.148)                      | 0.020<br>(0.034)                                 | 0.270**<br>(0.129)                                  | 0.447**<br>(0.215)                                 |
| <i>ARet<sub>-30,-1</sub></i> | -0.703**<br>(0.313)                   | -0.073<br>(0.083)                                | -0.380<br>(0.299)                                   | -0.661<br>(0.641)                                  |
| Constant                     | -1.248<br>(2.428)                     | -0.099<br>(0.523)                                | -2.062<br>(2.052)                                   | -3.115<br>(3.674)                                  |
| Sector FE                    | Yes                                   | Yes                                              | No                                                  | No                                                 |
| Quarter FE                   | Yes                                   | Yes                                              | No                                                  | No                                                 |
| Observations                 | 172                                   | 172                                              | 171                                                 | 171                                                |
| Adj./Pseudo R <sup>2</sup>   | 0.426                                 | 0.427                                            | 0.179                                               | 0.177                                              |

Notes: \*, \*\*, and \*\*\* indicate  $p < 0.1$ ,  $p < 0.05$ , and  $p < 0.01$ , respectively. Robust t-statistics are presented in parentheses.

As a robustness test, we construct a dummy variable, *ReadCommentDummy*, to denote whether an article has its comments read by at least one visitor. The mean of this dummy variable is 0.308, which implies that 30.8% of articles have their comments read by at least one visitor. The standard deviation is 0.463, so there is also significant variation in this dummy variable. In Table A1, we present the results from the robustness test that uses this dummy variable as the dependent variable. Columns (2) to (4) present the results for OLS, Probit, and Logit regressions, respectively. Because  $PosEA \neq 0$  perfectly predicts the outcome, so one observation is dropped and *PosEA* is not included in the Probit and Logit regressions (Columns 3 and 4). As a comparison, Column (1) presents the results for when  $\text{Log}(\text{ReadComment})$  is the dependent variable, which are the same as in Column (4) of Table 3 in the paper.

We obtain similar results when the dependent variable is a dummy variable, which has a significant level of variation. In short, we do not observe any significant difference between fake news articles and legitimate news articles in terms of how frequently and whether or not the article comments are read by visitors.

**Table A2. Summary Statistics: Before and After Matching**

| Variable                     | #Obs  | Median | Mean    | Std. Dev. | Min       | Max     |
|------------------------------|-------|--------|---------|-----------|-----------|---------|
| Panel A. Before Matching     |       |        |         |           |           |         |
| Treatment group              |       |        |         |           |           |         |
| <i>Log(Size)</i>             | 322   | 3.661  | 3.538   | 0.729     | 1.904     | 4.843   |
| <i>Market-to-Book</i>        | 322   | 2.186  | -12.075 | 67.329    | -335.723  | 19.507  |
| <i>ROA</i>                   | 322   | -0.662 | -3.580  | 16.562    | -144.069  | -0.193  |
| <i>LEV</i>                   | 322   | 0.556  | 9.647   | 57.007    | 0.272     | 391.310 |
| <i>ARet<sub>-30,-1</sub></i> | 322   | 0.025  | 0.117   | 0.347     | -0.494    | 1.487   |
| <i>ConsumerGoods</i>         | 322   | 0      | 0.019   | 0.135     | 0         | 1       |
| <i>Healthcare</i>            | 322   | 1      | 0.724   | 0.448     | 0         | 1       |
| Control group                |       |        |         |           |           |         |
| <i>Log(Size)</i>             | 14196 | 8.829  | 8.593   | 2.286     | 0.638     | 12.354  |
| <i>Market-to-Book</i>        | 14196 | 3.784  | 10.565  | 65.443    | -4027.244 | 713.515 |
| <i>ROA</i>                   | 14196 | 0.061  | -0.085  | 2.337     | -154.859  | 0.496   |
| <i>LEV</i>                   | 14196 | 0.591  | 0.660   | 3.609     | 0.014     | 247.099 |
| <i>ARet<sub>-30,-1</sub></i> | 14196 | 0.005  | 0.022   | 0.227     | -0.907    | 5.855   |
| <i>ConsumerGoods</i>         | 14196 | 0      | 0.295   | 0.456     | 0         | 1       |
| <i>Healthcare</i>            | 14196 | 0      | 0.182   | 0.386     | 0         | 1       |
| Panel B. After Matching      |       |        |         |           |           |         |
| Treatment group              |       |        |         |           |           |         |
| <i>Log(Size)</i>             | 248   | 3.968  | 3.767   | 0.582     | 1.904     | 4.843   |
| <i>Market-to-Book</i>        | 248   | 2.186  | -2.615  | 38.621    | -335.723  | 19.507  |
| <i>ROA</i>                   | 248   | -0.636 | -0.892  | 1.342     | -10.912   | -0.193  |
| <i>LEV</i>                   | 248   | 0.495  | 0.730   | 0.782     | 0.272     | 6.431   |
| <i>ARet<sub>-30,-1</sub></i> | 248   | 0.038  | 0.122   | 0.324     | -0.494    | 1.406   |
| <i>ConsumerGoods</i>         | 248   | 0      | 0.024   | 0.154     | 0         | 1       |
| <i>Healthcare</i>            | 248   | 1      | 0.899   | 0.302     | 0         | 1       |
| Control group                |       |        |         |           |           |         |
| <i>Log(Size)</i>             | 248   | 3.646  | 3.688   | 0.978     | 0.638     | 7.011   |
| <i>Market-to-Book</i>        | 248   | 2.186  | -11.679 | 257.831   | -4027.244 | 470.114 |
| <i>ROA</i>                   | 248   | -0.504 | -1.072  | 1.944     | -11.526   | 0.401   |
| <i>LEV</i>                   | 248   | 0.386  | 0.796   | 1.805     | 0.014     | 14.375  |
| <i>ARet<sub>-30,-1</sub></i> | 248   | -0.012 | 0.129   | 0.653     | -0.756    | 4.528   |
| <i>ConsumerGoods</i>         | 248   | 0      | 0.016   | 0.126     | 0         | 1       |
| <i>Healthcare</i>            | 248   | 1      | 0.927   | 0.260     | 0         | 1       |

In Table A2, we present the summary statistics for variables in the matching procedure for the treatment and control groups separately and for both before- and after-matching.
